# Supplementary material for: gmos: Rapid Detection of Genome Mosaicism over Short Evolutionary Distances
Source: PLOS journal article supplement (doi:10.1371/journal.pone.0166602), 2016-11-15
Supplement: S3 (10.1371/journal.pone.0166602.s003) [file journal.pone.0166602.s003]

**Table A – Comparison of *gmos* to *ClonalOrigin***

|            | <b>gmos</b>    |                |              | <b>ClonalOrigin</b> |                |                              |                |
|------------|----------------|----------------|--------------|---------------------|----------------|------------------------------|----------------|
| <i>s</i>   | <i>TPR</i> [%] | <i>FPR</i> [%] | <i>t</i> [s] | <i>TPR</i> [%]      | <i>FPR</i> [%] | <i>Number of detected RE</i> | <i>t</i> [s]   |
| 0.001      | 56.73          | 19.71          | 0.03         | 17.68               | 5.56           | 1.20                         | 1861.55        |
| 0.0025     | 67.07          | 9.38           | 0.03         | 58.48               | 7.78           | 1.90                         | 1941.84        |
| 0.005      | 85.63          | 11.30          | 0.02         | 90.36               | 6.03           | 2.10                         | 1884.47        |
| 0.01       | 83.50          | 10.00          | 0.02         | <b>91.78</b>        | <b>5.04</b>    | <b>2.00</b>                  | <b>2581.88</b> |
| 0.025      | 82.42          | 6.90           | 0.02         | 98.37               | 11.24          | 2.80                         | 3924.46        |
| 0.05       | 94.59          | 5.18           | 0.02         | 44.90               | 17.90          | 9.50                         | 12231.2        |
| <b>0.1</b> | <b>94.42</b>   | <b>1.64</b>    | <b>0.03</b>  | *                   |                |                              |                |
| 0.11       | 92.63          | 2.82           | 0.04         | *                   |                |                              |                |

Comparison of *gmos* to *ClonalOrigin* on simulated data sets, where each data set includes a recombinant query sequence, whose genealogy is shown in Fig 3 (see text for the details). The parameters *TPR* (the true positive rate), *FPR* (the false positive rate), *Number of detected RE* (the number of recombination events detected by *ClonalOrigin*) and *t* (the running-time measured in seconds) were calculated for each value of *s* (the evolutionary distance calculated as the relative number of segregating sites; Fig 3). The parameters' values were computed as the average over 10 data sets. In case of *ClonalOrigin*, *TPR* and *FPR* were measured for the recombination events, where  $S_2$  was the donor sequence and the query was the recipient: *TPR* is the fraction of query positions correctly detected to be horizontally transferred from the sequence  $S_2$  and *FPR* is the fraction of query positions incorrectly detected to be horizontally transferred from the sequence  $S_2$ . In case of *gmos*, *TPR* and *FPR* were measured for query positions assigned to  $S_2$ , where  $S_2$  was detected as the best hit: *TPR* is the fraction of query positions correctly assigned to be most closely-related to  $S_2$  and *FPR* is the fraction of query positions incorrectly assigned to be most-closely related to  $S_2$ .

\*Due to decrease in performances and expensive computation, *ClonalOrigin* was not tested for  $s \geq 0.1$ . The rows with bolded values represent the best scores for *gmos* ( $s=0.1$ ) and *ClonalOrigin* ( $s=0.01$ ), respectively.
